# Supplementary material for: Motility induced fracture reveals a ductile to brittle crossover in the epithelial tissues of a simple animal
Source: bioRxiv or medRxiv preprint supplement (doi:10.1101/676866), 2019-06-19
Supplement: Supplementary file [file media-1.pdf]

# 1 **Supplementary Information:**

## 2 ***Motility induced fracture reveals a ductile to brittle***

## 3 ***crossover in the epithelial tissues of a simple animal***

4 **Vivek N. Prakash<sup>1</sup>, Matthew S. Bull<sup>2</sup>, and Manu Prakash<sup>1\*</sup>**

5 <sup>1</sup>Department of Bioengineering, Stanford University, Stanford, California 94305, USA

6 <sup>2</sup>Department of Applied Physics, Stanford University, Stanford, California 94305, USA

7 <sup>3</sup>Chan Zuckerberg Biohub, San Francisco, California 94158, USA

8 \*manup@stanford.edu

9

### 10 **Methods used for Images in Figures**

11 Some experimental images of the *T. adhaerens* have been edited to remove the background, leaving only  
12 the animal for clarity. In these cases, a uniform black or white background has been introduced. Some  
13 images were edited to adjust levels of brightness, contrast and color for clarity.

### 14 **Interpretation and formulation of the cell-cell junction bonding/debonding**

### 15 **criterion**

16 We relate our simple model to existing literature and ideas before jumping into the debinding criterion.  
17 The debonding/bonding criteria is central to understanding the dynamics of tissues under load and how  
18 they dynamically reconfigure (or not) under external driving.

A very interesting and useful low order expansion of the energy of a confluent tissue within a plane is captured by a elegant simple energy function applied to vertex degrees of freedom (the energy function is reminiscent of a foam)<sup>1</sup>:

$$\varepsilon_i = k_A(A_i - A_o)^2 + \Gamma P_i^2 + \gamma P_i$$

19 The second order term in perimeter (behaving like an elasticity of the cortex) is important for stabilizing  
20 the shape of the cells when the first order term (like the cell surface tension) goes negative. Without this

21 stabilizing elasticity, cells with negative effective surface tension would stretch in an unstable fashion to  
 22 infinitely thin cells with large surface area, but near  $A_o$  area.<sup>2,3</sup>

23 A negative effective surface tension makes sense when we decompose the contributions of this term  
 24 into two competing first order contributions<sup>2</sup>.  $\gamma P_i \equiv \alpha P_i^{all} - \beta P_i^{shared}$ , where  $\alpha$  is the contribution from  
 25 the cell's internal cortical tension and  $\beta$  is the energy contribution from interaction with other sticky  
 26 cells. In the case of a perfectly confluent tissue with no edges (periodic BC or infinite size), the energy  
 27 contributions from both go negative when the shared energetic contributions exceed the cell's own surface  
 28 tension  $\alpha < \beta$ . This energetic description is powerful in the limit where the kinetics of the bonds is fast  
 29 compared to the timescales of interest<sup>4,5</sup>. This holds true in the long-timescale behavior of tissues flowing  
 30 under tension<sup>6</sup>.

On short timescales where the bond-lifetime is comparable to the dynamics, the transients begin to  
 play an important role in the response of the tissue to forcing (internal or external). To study the dynamics  
 of the bonds of the tissues, we can unfold the contributions of the two surface tension terms into:

$$\varepsilon_i = k_A(A_i - A_o)^2 + \Gamma P_i^2 + \alpha P_i + \sum_j \delta_{ji} \varepsilon_{junction}$$

With the complementary kinetics of the cell-cell junctions governed by the presence or absence of a bond,  
 denoted by  $\delta_{ij}$

$$\delta_{ij} = \begin{cases} 0, & \text{when bond is absent} \\ 1, & \text{when bond is present} \end{cases}$$

### 31 **Debonding criterion**

The first order description of the dynamics of the bonds under force turns to Bell's formulation of a first  
 passage process over an energy barrier<sup>7</sup>. In this case, the dynamics of a single junction-junction bond has  
 the lifetime,  $\tau$ , of:

$$\tau = \tau_o e^{\frac{E_o - r_o F}{k_B T}}$$

32 Where  $\tau_o$  is the natural lifetime of the bond,  $E_o$  is the bond energy.  $r_o$  is the distance along the reaction  
 33 coordinate between the bound and unbound state,  $F$  is the applied force,  $k_B T$  is the temperature in units of  
 34 energy.

This can be inverted to be used as a rate in the following kinetic master equation for a two-state system:

$$\frac{\partial}{\partial t} P_{bound} = r_{binding}(1 - P_{bound}) - r_{unbinding}(F)P_{bound}$$

35 However, a cell-cell junction is representative of a large ensemble of bonds all working in concert  
 36 to keep the cells stuck together (with higher order cis and trans assemblies forming over a hierarchy of  
 37 timescales)<sup>8,9</sup>.

38 We can justify approximating these ensemble dynamics as a threshold by considering distributed load  
 39 amplification. When a single bond-fails, the neighbors feel a sharp increase in their load causing them to  
 40 fail, and so on. We get an avalanche of bond failures that looks a lot like a threshold.

Using Bell's rate to solve for the steady state of the distribution:

$$\frac{\partial}{\partial t} P = 0 = r_b(1 - P_{ss}) - r_u e^{\beta(E_o - r_o F)} P_{ss}$$

We get a steady state probability which is dependent upon force.

$$P_{ss} = \frac{1}{1 + \frac{r_u}{r_b} e^{-\beta(E_o - r_o F)}}$$

Then the ensemble becomes a Bernoulli distribution if the binding events are independent:

$$p(n; N(t), P(F)) = (P_{ss}(F))^n (1 - P_{ss}(F))^{N(t) - n}$$

41 Where  $n$  is the number of bound junctions.  $N(t)$  is the recruitment of cis-bonds which create these  
 42 large scale islands of cell-cell adhesion clusters with a timescale in the  $\sim 10$  of seconds<sup>9</sup>.  $P_{ss}(F)$  is the  
 43 steady state which is determined by a single external force distributed over the population of attached

44 bonds.

45 Recall that the mean of a Bernoulli distribution is simply  $\langle n \rangle = N(t)P_{ss}$

Next, we calculate for a given  $F_{pull}$  the mean force distributed to each of the bonds<sup>10</sup>. This takes for the form of:

$$\langle F \rangle = \frac{F_{pull}}{\langle n \rangle}$$

We can take the analytical form of the expectation value for a Bernoulli random process:

$$\langle F \rangle = \frac{F_{pull}}{N(t)P_{ss}(\langle F \rangle)} = \frac{F_{pull} \left( 1 + \frac{r_u}{r_b} e^{-\beta(E_o - r_o \langle F \rangle)} \right)}{N(t)}$$

The calculation does not have an analytical solution:

$$N(t)\langle F \rangle - \frac{r_u}{r_b} e^{-\beta(E_o - r_o \langle F \rangle)} = F_{pull}$$

46 So given that this function set transcends algebraic interrogation, we expanded our exponential as a  
47 Taylor series to  $\mathcal{O}(F)$ . This gives us the result:

$$\langle F \rangle \sim \frac{\left( 1 + \frac{r_u}{r_b} e^{-\beta E_o} \right) F_{pull}}{N(t) - \frac{r_u}{r_b} \beta r_o e^{-\beta E_o} F_{pull}}$$

This is the low order approximation of the force dependence and looks like the functional form:

$$\langle F \rangle(F_{pull}) \sim \frac{C_1}{\frac{1}{F_{pull}} - C_2}$$

48 The average force on each two-state system diverges when  $N(t)F_{pull}^{-1} = \frac{r_u}{r_b} \beta r_o e^{-\beta E_o}$ .

If we recall that our probability of being bound looks like:

$$P_{ss} = \frac{1}{1 + \frac{r_u}{r_b} e^{-\beta(E_o - r_o \langle F \rangle)}}$$

Then, we can plug in our calculated mean force with feedback to give us the probability of steady state binding for a given pull force:

$$P_{ss}(F_{pull}) \approx \frac{1}{1 + \frac{r_u}{r_b} e^{-\beta \left( E_o - \frac{r_o C_1}{F_{pull}^{-1} - C_2} \right)}}$$

As  $F_{pull} \rightarrow C_2^{-1}$  the exponential diverges rapidly sending the binding probability toward 0. For sufficiently high affinities, this function is well approximated by a Heaviside step function.

$$P_{ss}(F_{pull}) \approx P_{ss}(\langle F \rangle = 0) (1 - \Theta_{Heaviside}(F_{pull} - F_c))$$

49 The distribution, and therefore the probability of debonding, is then captured by a single value, the  
 50 force threshold of debonding,  $F_c$ . In the elastic limit, we can translate our threshold yield force, into a  
 51 geometric criterion allowing us to port over efficient methods in computational geometry to quickly update  
 52 the connectivity at each time-point.

### 53 ***Comparison of debonding criteria with results from contact mechanics***

This single threshold approach is complemented by the formulation of Hertz contact mechanics with adhesion energy formulated by Johnson and coworkers<sup>11</sup>. The JKR theory for contact mechanics asks the question about the interplay between the stored elastic energy of deformation and the surface energy of contact. The math is identical to fracture mechanics in that the critical values are tight thresholds determined by the radius, the interaction energy, and the critical load to separate the two surfaces. In this picture, strain and stress are related through the modulus and there is no transients. From the perspective of JKR theory, there is a finite pull-off load or force which is equal to the crossover in the energy contributions (being attached or not). This crossover occurs at:

$$F_{pull\ off} = 3\pi\Delta\gamma R$$

54 Where  $\Delta\gamma = \gamma_1 + \gamma_2 - \gamma_{12}$ .

55 Notice that the energy between the interfaces is the integral of the LJ interaction potential to give the

56 work to remove the sphere. While the interpretation is slightly different, the debonding threshold comes  
 57 out similarly from this very distinct approach. [cite same as above]

### 58 **Bonding criterion**

59 For rebonding We propose a single timescale for maturation,  $\tau_{mature}$ , on the 'stiffness' of the cell-cell  
 60 junction. This single timescale is consistent with the local recruitment of the cadherin complex, which we  
 61 have represented above as  $N(t)$ . The number of cytoskeletal links between the two cells correlates to the  
 62 stiffness and the number of links, and is determined by the number of cadhearins in the local cluster.

With  $N(t) = N_o(1 - e^{-t/\tau_{mature}})$ , the cell-cell bond energy looks like:

$$\epsilon_{bond}(t) = N_o \epsilon_{junction} \left( 1 - e^{-t/\tau_{mature}} \right)$$

63 Where  $t$  is the age of the bond since entering into the triangulation and the geometric cutoff,  $L_{break}$ .

64 By focusing our attention on the behavior of the connectivity matrix to emphasize the dynamics  
 65 of cell-cell junctions over cellular shape dynamics, we open up the door to a careful comparative study  
 66 incorporating higher order cell dynamics more consistent with recent work<sup>12,13</sup>. Undoubtedly cell shape  
 67 will contribute to our understanding of the collective action in a tissues response to fast timescale forcing  
 68 and will be a target in the next generation of models.

### 69 **Applying bonding/debonding criteria to low order dynamics of a model tissue**

Following above, we wrote two models to explore the impact of cell shape [results not presented in detail  
 here]. One where cells are promoted to a large number of degrees of freedom and their shape is governed  
 by

$$\epsilon_i = k_A(A_i - A_o)^2 + \Gamma P_i^2 + \alpha P_i + \sum_j \delta_{ji} \epsilon_{junction}$$

The second, we removed the shape dynamics and replaced it with a characteristic cell compliance (of  
 the form of a Hertizian interaction). We capture qualitatively the compliance of the cells (in a two body  
 way) by linearizing the elasticity of the vertex model energy and using those fictious springs between the

cells. This simplified energy emphasizes the central role of dynamics of this connectivity network:

$$\varepsilon_i = \sum_j \delta_{ji} \varepsilon_{junction}$$

70 We can expand the energy of the junction term into:  $\varepsilon_{junction} = \int_0^{L_{break}} d\ell \cdot (-k_{junction} \Delta\ell)$ . This  
71 becomes the energy of the bond.

72 The dynamics of this network emerge as two simple possibilities. (1) the cell-cell junction is stretched  
73 to the threshold of failure resulting in the breaking of the bond and a formation of a new edge ('edge'  
74 meaning that we do not locally conserve the number of constraints, no CCC). (2) The network can  
75 undergo a transformation similar to a shear transformation zone or t1 (which conserves the number of local  
76 constraints). The STZ type transformations occur when the energy of one configuration is more favorable  
77 than the other, however, the time dynamics of rebonding still control the kinetics of the bond swap. The  
78 old bond will break and the new bond will slowly form.

79 This competition between stress relaxation mechanisms forms the basis of the competition between  
80 fracture and flow.

## 81 **Steady state solutions to dissipative failure of a toy model**

82 The simplest viscoelastic system comes in the form of a Maxwell element: a damping in parallel to a  
83 series system of a damping and a spring.

84 We can define the stress of our linear spring as  $\sigma_s(t) = k\ell_s(t)$ , where  $\ell_s$  is the strain.

85 For the simple damper, the stress goes as :  $\sigma_d(t) = \eta \frac{\partial}{\partial t} \ell_d(t)$ .

86 If we take our results from up above, we suggest that a force threshold looks like a good low order  
87 model for the rupture criterion, thus we can apply the well known stress criterion for failure. This suggests  
88 that failure occurs at a value  $\sigma^*$ .

One can then apply a imposed strain rate to the connecting walls  $\dot{\ell}_{pull}(t)$  and generate the equation  
for the growing internal stress as:

$$\frac{\partial}{\partial t} \sigma_s = \eta \dot{\ell}_{pull} - k\ell_s$$

89 This relationship has the straightforward implication that the steady state is that the material will fail  
 90 if the imposed pull rate is faster than  $\dot{\ell}_{pull} \geq \frac{\sigma^*}{\eta}$ .

If the flowing material instead falls into the Herschel-Buckley equation of yield stress fluids, as we might expect for a flowing material, this relationship instead becomes:

$$\frac{\partial}{\partial t} \sigma_s = \eta_{HB} \dot{\ell}_{pull}^n - \sigma_y - k \ell_s$$

91 With  $n$  becoming the power of the HB equation ( $\sim 3$  for our sticky material) and  $\sigma_y$  being the yield stress.

92 Outside the transients this means that failure will occur for imposed pulling rates:  $\dot{\ell}_{pull} \geq \left( \frac{\sigma^* - \sigma_y}{\eta_{HB}} \right)^{1/n}$ .

If we combine these two results, we find that the two complementary mechanisms of relaxation can combine forces to give:

$$\frac{\partial}{\partial t} \sigma_s = \eta_{HB} \dot{\ell}_{pull}^n - \sigma_y + \eta \dot{\ell}_{pull} - k \ell_s$$

93 At small pull rates, the relaxation timescale of the tissue dominates. At large pull rates the relaxation  
 94 through neighborhood exchange takes over.

The cross-over value occurs when:  $\eta_{HB} \dot{\ell}_{cx}^n - \sigma_y = \eta \dot{\ell}_{cx}$  which becomes:

$$\dot{\ell}_{cx} = \frac{\left(\frac{2}{3}\right)^{1/3} \eta}{\chi} + \frac{\chi}{2^{1/3} 3^{2/3} \eta_{NB}}$$

95 where  $\chi \equiv \left( 9\eta_{HB}^2 \sigma_y + \sqrt{3} \sqrt{27\eta_{HB}^4 \sigma_y - 4\eta_{HB}^3 \eta^3} \right)^{1/3}$

96 A followup to this question is: does the cross-over between subcellular and cellular scale flows occur  
 97 before the threshold for fracture?

98 Generically, there are four outcomes to a pull experiment in this toy model. (1) At low pull rates,  
 99 and fast cellular relaxation timescales, the tissue yields by sub-cellular flow alone. (2) At medium pull  
 100 rates with a slow cellular relaxation relative to the rate of loading, the tissue can cross over into a flow by  
 101 neighborhood rearrangements. (3) When the yield stress is higher than the fracture stress, the tissue never  
 102 flows via rearrangement and only flows via subcellular processes up to breaking (on these fast timescales,



103 the bond-lifetime controls the kinetics rearrangements) (4) At sufficiently fast loading rates, the tissue fails  
104 catastrophically as the loading cannot be compensated for via either of the available stress relaxation  
105 mechanisms (on these timescales, a third candidate might be stress induced oriented cell division)<sup>14</sup>.

106 This toy model illustrates that even with higher order mechanisms of cell relaxation on short  
107 timescales<sup>15</sup>, the concept of pitting flow versus fracture as competing mechanisms holds a useful tool  
108 for understanding. The presence of such a mechanism enriches the character of tissue under fast loading  
109 timescales and suggests an interesting interplay between flow mechanisms which can serve complementary  
110 roles.

## 111 **Kinetic perspective on the competition between fracture and flow**

112 The central theoretical concept in this work is the competition between edge formation and neighborhood  
113 exchange (or fracture versus flow). While in the main text, we developed an argument on the foundation  
114 of a numerical study with a simple real-space interpretation, here we attempt to formulate the argument in  
115 a more model-agnostic perspective. This toy argument is a simple tool for understanding outcomes and  
116 coming up with sharp definitions.

117 One possible approach to this is from the perspective of the kinetics on a dynamic energy landscape.

118 Let's consider a three state system with the following properties.

- 119 • State 1 corresponds to a configuration of the neighborhood matrix between 4 particles. It is  
120 metastable at zero force.
- 121 • State 2 corresponds to the lowest energy transformation of that neighborhood matrix which preserves  
122 the number of local constraints. It is metastable at zero force and is an STZ like transformation  
123 away from state 1.
- 124 • State 3 corresponds to a fractured state where the number of constraints is fewer than state 1 or 2.

125 First, it is critical to link these multistate kinetics to the practical definition of ductile and brittle used  
126 in this text. A generically ductile material will pass from State 1 to State 2 a majority of the time. Whereas  
127 a generically brittle material will preferentially pass from State 1 to State 3. A final possibility is that

128 material could pass quickly through State 2 en route to State 3. In this language, this material will still  
129 behave in a 'brittle' fashion, if the lifetime in State 2 is insignificant compared to the timescales of the  
130 problem. If a material has a long-lived occupancy in State 2 at any force, we call it ductile. A more ductile  
131 material will almost exclusively use the State 1 to State 2 path on this kinetic path for a large range of  
132 forcing.

133 Let's assume that the energy needed to generate new edge is  $\epsilon_{break}^B$ . The activation energy for this  
134 transformation is the same as the bounding energy.

135 Let's further assume that the energy needed to undergo an STZ transition is  $\epsilon_{STZ}^B$ . This is a barrier  
136 height and represents a combination of both elastic and adhesive energies at play. Noteworthy, this  
137 landscape is time dependent controlled by timescales set by  $\tau_{mature}$  and the neighborhood topology which  
138 we approximated by a computational geometry problem (reasonable in the limit of stiff cells and lower  
139 adhesion energies i.e. low shape parameter).

140 We apply an external force to state 1 driving it toward state 2.

141 On the long time limit (where the transients of the bond kinetics are short compared to the timescales),  
142 The outcome of the pull (whether it STZs or breaks) will be dependent upon the relationship between the  
143 activation energy for the STZ,  $\epsilon_{STZ}$  (which is a configuration dependent calculation) versus the energy to  
144 sever the connection between cells and create new edge,  $\epsilon_{break}$ .

145 When  $\epsilon_{break} < \epsilon_{STZ}$ , new edges will form. In the other case, the tissue will flow through STZs.

146 This relationship is born out in the crossover observed at low  $\tau_{mature}$  between fracture and flow in the  
147 numerics. Recall that  $\epsilon_{break} \sim \ell_{break}^2$  whereas  $\epsilon_{STZ}$  will be essentially independent of the edge-formation  
148 energy and will be determined by the complicated interplay of cell compliance and local configuration.  
149 Thus we expect a cross-over in the qualitative behavior of the tissue when these energy scales intersect (in  
150 the long-time limit).

151 On the timescales where the cell-cell junction kinetics become relevant, the problem requires a little  
152 more careful a treatment.

153 By a mean first passage process, the kinetics on this energy landscape can be approximated via  
154 transition state theory using the energy barrier height separating the valleys. This is essentially a study of  
155 the rate of extreme values in energy given a finite temperature.

The rates between these three states then look something like:

$$r_{1 \rightarrow 2} \sim e^{-\beta \varepsilon_{STZ}} \quad r_{1 \rightarrow 3} \sim e^{-\beta \varepsilon_{break}} \quad r_{2 \rightarrow 3} \sim e^{-\beta \varepsilon_{23Barrier}(t_{age})}$$

156 There is now a new term in here which has an interesting time-dependence,  $\varepsilon_{23Barrier}(t)$  which represents  
 157 the barrier between the new STZ state and the state with new edges. Due to the maturation time of the  
 158 cell-cell junction, this is time dependent. The junction stabilizes with time.

The energy of this relationship looks something like:

$$\varepsilon_{23Barrier}(t_{age}) \sim \varepsilon_{break} - \varepsilon_j N_o \left( 1 - e^{-t_{age}/\tau_{mature}} \right)$$

159 Where  $t_{age}$  is acting as the age of the new cell-cell junction, just following its recent STZ type transforma-  
 160 tion.

Using a Bell-like dependence on force in the direction of a transformation, the rates will take the form:

$$r_{1 \rightarrow 2} \sim e^{-\beta \varepsilon_{STZ} + F \cdot \hat{r}_{12} \Delta r_{12}} \quad r_{1 \rightarrow 3} \sim e^{-\beta \varepsilon_{break} + F \cdot \hat{r}_{13} \Delta r_{13}} \quad r_{2 \rightarrow 3} \sim e^{-\beta \varepsilon_{23Barrier}(t_{age}) + F \cdot \hat{r}_{23} \Delta r_{23}}$$

161 Where  $F \cdot \hat{r}_{ij} \Delta r_{ij}$  is the applied force projected along the reaction coordinate between state  $i$  and state  $j$   
 162 multiplied by the projected distance along the reaction coordinate of the minimum.

163 We can use this simple back of the envelop calculation to approximate the expected probability of  
 164 ending up in State 3 within a time,  $t_{observe}$  and compare that to the probability of ending up in state 2  
 165 within time  $t_{observe}$ . This ratio gives us a quantitative measure of where on the ductile-brittle spectrum we  
 166 might expect to find a model system for given  $\varepsilon_{STZ}$ ,  $\varepsilon_{break}$ ,  $\varepsilon_j N_o$ ,  $\tau_{mature}$ , and  $F \cdot \hat{r}_{ij} \Delta r_{ij}$ .

For the case of  $\tau_{mature} \rightarrow 0$ , the time dynamics of the second term does away and we can just define

this tractable matrix collecting all of our rates:

$$K \equiv \begin{bmatrix} -e^{-\beta\varepsilon_{STZ}+F} - e^{-\beta\varepsilon_{break}+F} & e^{-\beta\varepsilon_{STZ}+F} & e^{-\beta\varepsilon_{break}+F} \\ 0 & -e^{-\beta\varepsilon_{break}+F} & e^{-\beta\varepsilon_{break}+F} \\ 0 & 0 & 1 \end{bmatrix}$$

The measure of the ratio of trajectories which pass through state 2 to state 3 tells us something about where this failure lies on the ductile-to-brittle spectrum. In the simplest one step, this looks like:

$$\frac{\text{number of STZ}}{\text{number of fracture}} = \frac{e^{-\beta\varepsilon_{STZ}}}{e^{-\beta\varepsilon_{break}}}$$

167 .

168 In the first step the ductility of the flow-fracture material looks like something which is dependent  
169 upon only the energy barriers.

170 But this doesn't catch the intuition that the lifetime in the second state is also important for under-  
171 standing the material response at the threshold of failure. We can learn something about that by evolving  
172 the probabilities forward in time for a small period  $t_{observe}$ .

After time  $t_{observe}$  the dynamics will have gone:

$$|P(t = t_{observe})\rangle = K^{t_{observe}} |P(t = 0)\rangle$$

To generalize taking this matrix to the  $t_{observe}$  power, we can find the transformation matrix which diagonalizes it and then take the power of the diagonalized matrix sandwiched by the tranformation:

$$K^{t_{observe}} = S \Lambda^{t_{observe}} S^{-1}$$

173 This equivalent to finding the normal modes of this kinetic matrix, and using the time evolution operator  
174 to advance forward.

Which we can then apply to our initial state:

$$|P(t=0)\rangle = \begin{bmatrix} 1 \\ 0 \\ 0 \end{bmatrix}$$

We calculate our a template matrix raised to the power of  $n \rightarrow t_{observe}$  such that  $a \rightarrow e^{-\beta \epsilon_{STZ} + F}$  and  $b \rightarrow a \rightarrow e^{-\beta \epsilon_{break} + F}$

$$\begin{bmatrix} -a-b & a & b \\ 0 & -b & b \\ 0 & 0 & 1 \end{bmatrix}^n = \begin{bmatrix} (-a-b)^n & (-b)^n - (-a-b)^n & \frac{(-b)^{n+1} + b}{b+1} \\ 0 & (-b)^n & \frac{(-b)^{n+1} + b}{b+1} \\ 0 & 0 & 1 \end{bmatrix}$$

175 The outcome of this calculation will take the ratio of the probabilities of being in state 2 and that  
 176 of state 3. For small values of this ratio, the system appears brittle and for large values of this ratio, the  
 177 system appears more ductile. The pathway from state 1 to 3 will define it dissipation.

178 The next step is to consider how a system with a finite maturation time behaves under force. This is  
 179 trickier, but can be approximated in a couple ways. One of which is by adding a long chain of states which  
 180 keep track of the age's effect on the transition probability. For the purpose of this work, it is sufficient to  
 181 play out the thought experiment: if the mean rate from 2 to 3 is greater then the material will behave in a  
 182 more brittle manner with a finite observation time. This means that an order 1 maturation time will have  
 183 the effect of driving the system to more brittle-like behavior.

184 Clearly, this toy representation is an oversimplification of the rich spatio temporal dynamics of  
 185 yielding. It neglects the coupling and facilitated dynamics whereby an STZ can initiate another STZ  
 186 nearby coupled via the 2D shear transformation Green's function<sup>16</sup>. It is also worth cautioning that this toy  
 187 model is a configuration dependent oversimplification. There are many configuration dependent energies  
 188 that can be calculated for different types of this problem (e.g. any of the energy functions suggested in the  
 189 earlier paper are great candidates), but the point is that they are strongly local configuration dependent and  
 190 thus that is what makes cell-resolved modeling important for understanding failure in these heterogenous

191 materials at wavelengths comparable to the constituent cell size.

192 A final note is that the statistics show here assume that thermal-like (Boltzmann distributed) flucua-  
193 tions are driving these transitions. Since these flucuations are active in nature, other distributions may be  
194 better descriptions to understand the finer points.

195 Despite its extreme simplicity, this second toy representation helps us communicate the central role  
196 between flow and fracture by making clear definitions, reasonable calculations and a playground for  
197 exploring the implication of input parameters on the position in the ductile to brittle spectrum of response.

## 198 **Supplementary Information: Videos**

### 199 **1. Video1.mov: Asexual reproduction by fission in *Trichoplax adhaerens*.**

200 Time-lapse quasi-dark field imaging of animals in lab culture conditions using a DSLR camera. A  
201 single animal ‘splits into two’ by a binary fission process in about one hour. Video playback is sped  
202 up, and time stamp represents hours and minutes. Scale bar: 3 mm.

### 203 **2. Video2.mov: Physiological tissue fractures in the ventral epithelium of *Trichoplax adhaerens*.**

204 Time-lapse quasi-dark field imaging of animals in lab culture conditions using a DSLR camera. The  
205 ventral epithelium sustains fracture holes which heal completely in about one hour. Video playback  
206 is sped up, and time stamp represents hours and minutes. Scale bar: 1 mm.

### 207 **3. Video3.mov: Physiological tissue fractures in the dorsal epithelium of *Trichoplax adhaerens*.**

208 Time-lapse quasi-dark field imaging of animals in lab culture conditions using a DSLR camera.  
209 The dorsal epithelium sustains fracture holes which grow in size and do not heal. These animals  
210 eventually become long string-like animals over about 7 hours. Video playback is sped up, and time  
211 stamp represents hours and minutes. Scale bar: 3 mm.

### 212 **4. Video4.mov: Ventral tissue fractures at a cellular resolution.**

213 Time-lapse confocal imaging of animals in an open dish configuration matching native culture  
214 conditions. The ventral epithelium is tagged with a fluorescent cell membrane dye (green), and a  
215 lysotracker dye (red) that labels acidic granules in lipophil cells. Videos are looped over 5 secs, and  
216 the time stamps on images represent minutes and seconds. Scale bar: 50 um.

### 217 **5. Video5.mov: Model results with steady pulling.**

218 We display the phase diagram from our heuristic tissue model, which explores a parameter sweep of  
219 steady force gradient versus the threshold strain for breaking cell-cell bonds. Next, we sequentially  
220 show simulations that demonstrate cases of elastic, ductile and brittle tissue properties — and their  
221 corresponding parameters on the phase diagram. The time stamps represent simulation units.

### 222 **6. Video6.mov: Model results with unsteady pulling.**

223 We show simulations with unsteady pulling of the model tissue, and demonstrate how this captures  
224 both fractures and healing. The time stamps represent simulation units.

225 **7. Video7.mov: Tension force-induced brittle fracture in *Trichoplax adhaerens*.**

226 Time-lapse fluorescence microscopy imaging reveals a tensile force-induced fracture. The ventral  
227 epithelium is tagged using a lysotracker dye, which labels acidic granules in lipophil cells. Video  
228 playback is real time, and time stamp represents minutes and seconds. Scale bar: 0.5 mm.

229 **8. Video8.mov: Shear force-induced brittle fracture in *Trichoplax adhaerens*.**

230 Time-lapse fluorescence and bright field microscopy imaging reveals a shear force-induced fracture  
231 in the ventral epithelium. The dorsal epithelium is tagged using 0.5 um sticky, fluorescent micro-  
232 beads. A Particle Image Velocimetry (PIV) analysis is carried out to quantify the internal tissue  
233 velocity fields (highlighted by green arrows). Video playback is sped up, and time stamp represents  
234 minutes and seconds. Scale bar: 1 mm.

235 **9. Video9.mov: Non-affine motion analysis on experimental data.**

236 Time-lapse fluorescence and bright field microscopy imaging reveals a shear force-induced fracture  
237 in the ventral epithelium. The dorsal epithelium is tagged using 0.5 um sticky, fluorescent micro-  
238 beads. A Particle Tracking analysis is carried out to quantify the non-affine motion of the micro-  
239 beads (with magnitude highlighted by colors). Video playback is sped up, and time stamp represents  
240 minutes and seconds. Scale bar: 1 mm.

241 **10. Video10.mov: Correlation between non-affine motion and internal strain rate, in experimen-  
242 tal data.**

243 Time-lapse fluorescence and bright field microscopy imaging reveals a shear force-induced fracture  
244 in the ventral epithelium. The dorsal epithelium is tagged using 0.5 um sticky, fluorescent micro-  
245 beads. Larger values of non-affine motion are thresholded and overlaid (white dots) on contours  
246 (jet colorbar) of the internal strain rate calculated from the PIV analysis. Video playback is sped up,  
247 and time stamp represents minutes and seconds. Scale bar: 1 mm.



## 248 References

- 249 **1.** Nagai, T. & Honda, H. A dynamic cell model for the formation of epithelial tissues. *Philos. Mag.*  
250 *B: Phys. Condens. Matter; Stat. Mech. Electron. Opt. Magn. Prop.* **81**, 699–719, DOI: [10.1080/](https://doi.org/10.1080/13642810108205772)  
251 [13642810108205772](https://doi.org/10.1080/13642810108205772) (2001).
- 252 **2.** Manning, M. L., Foty, R. A., Steinberg, M. S. & Schoetz, E.-M. Coaction of intercellular adhesion  
253 and cortical tension specifies tissue surface tension. *Proc. Natl. Acad. Sci.* **107**, 12517–12522, DOI:  
254 [10.1073/pnas.1003743107](https://doi.org/10.1073/pnas.1003743107) (2010).
- 255 **3.** Bi, D., Lopez, J. H., Schwarz, J. M. & Manning, M. L. A density-independent rigidity transition in  
256 biological tissues. *Nat. Phys.* **11**, 1074–1079, DOI: [10.1038/nphys3471](https://doi.org/10.1038/nphys3471) (2015). [1409.0593](https://doi.org/10.1038/nphys3471).
- 257 **4.** Park, J. A. *et al.* Unjamming and cell shape in the asthmatic airway epithelium. *Nat. Mater.* **14**,  
258 1040–1048, DOI: [10.1038/nmat4357](https://doi.org/10.1038/nmat4357) (2015).
- 259 **5.** Bi, D., Lopez, J. H., Schwarz, J. M. & Manning, M. L. A density-independent rigidity transition in  
260 biological tissues. *Nat. Phys.* **11**, 1074–1079, DOI: [10.1038/nphys3471](https://doi.org/10.1038/nphys3471) (2015).
- 261 **6.** Schoetz, E.-M. *Dynamics and Mechanics of Zebrafish Embryonic Tissues*. Ph.D. thesis, TU Dresden  
262 (2007).
- 263 **7.** Bell, G. I. Models for the specific adhesion of cells to cells. *Science* **200**, 618–627, DOI: [10.1017/](https://doi.org/10.1017/s0001867800035254)  
264 [s0001867800035254](https://doi.org/10.1017/s0001867800035254) (1978).
- 265 **8.** Yap, A. S., Gomez, G. A. & Parton, R. G. Adherens Junctions Revisualized: Organizing Cadherins as  
266 Nanoassemblies. *Dev. Cell* **35**, 12–20, DOI: [10.1016/j.devcel.2015.09.012](https://doi.org/10.1016/j.devcel.2015.09.012) (2015).
- 267 **9.** Chen, J., Newhall, J., Xie, Z. R., Leckband, D. & Wu, Y. A Computational Model for Kinetic Studies  
268 of Cadherin Binding and Clustering. *Biophys. J.* **111**, 1507–1518, DOI: [10.1016/j.bpj.2016.08.038](https://doi.org/10.1016/j.bpj.2016.08.038)  
269 (2016).
- 270 **10.** Wyatt, T., Baum, B. & Charras, G. A question of time: Tissue adaptation to mechanical forces. *Curr.*  
271 *Opin. Cell Biol.* **38**, 68–73, DOI: [10.1016/j.ceb.2016.02.012](https://doi.org/10.1016/j.ceb.2016.02.012) (2016).
- 272 **11.** Johnson, K. L., Kendall, K. & Roberts, A. D. Surface Energy and the Contact of Elastic Solids. *Proc.*  
273 *Royal Soc. A: Math. Phys. Eng. Sci.* **324**, 301–313, DOI: [10.1098/rspa.1971.0141](https://doi.org/10.1098/rspa.1971.0141) (1971).

- 274 **12.** Latorre, E. *et al.* Active superelasticity in three-dimensional epithelia of controlled shape. *Nature*  
275 **563**, 203–208, DOI: [10.1038/s41586-018-0671-4](https://doi.org/10.1038/s41586-018-0671-4) (2018).
- 276 **13.** Khalilgharibi, N. *et al.* Stress relaxation in epithelial monolayers is controlled by actomyosin cortex.  
277 *Nat. Phys.* 302158, DOI: [10.1101/302158](https://doi.org/10.1101/302158) (2019).
- 278 **14.** Charras, G. & Yap, A. S. Tensile Forces and Mechanotransduction at Cell–Cell Junctions. *Curr. Biol.*  
279 **28**, R445–R457, DOI: [10.1016/j.cub.2018.02.003](https://doi.org/10.1016/j.cub.2018.02.003) (2018).
- 280 **15.** Khalilgharibi, N. *et al.* Stress relaxation in epithelial monolayers is controlled by the actomyosin  
281 cortex. *Nat. Phys.* DOI: [10.1038/s41567-019-0516-6](https://doi.org/10.1038/s41567-019-0516-6) (2019).
- 282 **16.** Nicolas, A., Ferrero, E. E., Martens, K. & Barrat, J.-L. Deformation and flow of amorphous solids:  
283 An updated review of mesoscale elastoplastic models. *arxiv preprint* DOI: [10.1103/RevModPhys.90.](https://doi.org/10.1103/RevModPhys.90.045006)  
284 [045006](https://doi.org/10.1103/RevModPhys.90.045006) (2017). [1708.09194](https://arxiv.org/abs/1708.09194).
